# Supplementary material
Source: PubMed Central journal article supplement (PMC5166523)
Supplement: NIHMS747682-supplement-Supplemental_Data.pdf [file NIHMS747682-supplement-Supplemental_Data.pdf]

## **SUPPLEMENTARY MATERIAL**

### **Supplementary Methods**

#### **Clinicopathological and demographic variables associated with overall survival in our patient population (Supplementary Table 4)**

In order to assess which clinicopathological and demographic variables impact overall survival in our patient set, we tested each of these variables in separate univariate Cox proportional hazards models. As can be seen in Supplementary Table 4, stage, primary tumor thickness, ulceration, mitotic rate, histological subtype, and age at diagnosis were all strongly associated with overall survival. In addition, family history, AJ ancestry, and gender showed borderline associations. We then incorporated each of these variables into a single multivariate model in order to identify which were independently associated with survival (Supplementary Table 4). While the strength of each association was reduced, likely due to the correlations between some clinicopathological variables as well as their inclusion into the staging system, many remained significant ( $P$  value  $<0.05$ ): stage, thickness, ulceration, histological subtype, and age at diagnosis. Mitotic rate, family history of melanoma and gender were not significant prognostic factors when included into this multivariate model.

#### **Survival analysis of *IL10* haplotypes. (Supplementary Table 5)**

Haplotype blocks were defined for SNPs associated with melanoma overall survival ( $P$  value  $<0.05$ ) in the fine mapping analysis of the 1q32.1 locus (Haploview). Haplotypes were phased using plink, and haplotypes with the highest probability for each individual were included into a

multivariate Cox proportional hazards model to assess their correlation with melanoma overall survival.

**Supplementary Table 1:** Previous reports on association between genetic variation in immunomodulatory genes and cutaneous melanoma survival

| <b>Immunomodulatory genetic variants discovered</b> | <b>Cohort size</b> | <b>No. of immunomodulatory genes analysed</b> | <b>No. of SNPs analysed</b> | <b>Outcome</b>                                                                                 | <b>Reference</b> |
|-----------------------------------------------------|--------------------|-----------------------------------------------|-----------------------------|------------------------------------------------------------------------------------------------|------------------|
| <b>CD28 rs3181098</b>                               | 763                | 3                                             | 25                          | reduced metastases free survival (P=0.06)                                                      | [1]              |
| <b>HLA-DBQ1*0301</b>                                | 259                |                                               | 1                           | decreased disease-free survival (P=0.0002)                                                     | [2]              |
| <b>ICOS rs11571323</b>                              | 763                | 3                                             | 25                          | with reduced overall survival (P=0.04)                                                         | [1]              |
| <b>IFNG rs2430561</b>                               | 90                 | 2                                             | 2                           | reduced overall survival (P<0.001)                                                             | [3]              |
| <b>IFNW1 rs10964859</b>                             | 752                | 15                                            | 44                          | reduced overall survival (P=0.04); increased risk of death following metastasis (P=0.01)       | [4]              |
| <b>IFNW1 rs10964862</b>                             | 752                | 15                                            | 44                          | reduced melanoma-free survival (P=0.04); increased risk of death following metastasis (P=0.04) | [4]              |
| <b>IL10 rs1518111</b>                               | 552                | 9                                             | 35                          | increased risk for melanoma-related mortality (P=0.026)                                        | [5]              |
| <b>IL10 rs18000871</b>                              | 42                 | 3                                             | 5                           | decreases survival time (P=0.05)                                                               | [6]              |
| <b>IL10 rs18000896</b>                              | 98                 | 1                                             | 3                           | decreased survival time and mean age at diagnosis (P<0.05)                                     | [7]              |
| <b>IL10 rs18000896</b>                              | 42                 | 3                                             | 5                           | decreases survival time (P=0.002)                                                              | [6]              |
| <b>IL10 rs18000896</b>                              | 90                 | 2                                             | 2                           | reduced overall survival (P=0.065)                                                             | [3]              |
| <b>IL10 rs1800871</b>                               | 552                | 9                                             | 35                          | increased risk for melanoma-related mortality (P=0.018)                                        | [5]              |
| <b>IL10 rs1800872</b>                               | 552                | 9                                             | 35                          | increased risk for melanoma-related mortality (P=0.025)                                        | [5]              |
| <b>TLR3 rs13126816</b>                              | 552                | 9                                             | 35                          | increased risk for melanoma-related mortality (P=0.014)                                        | [5]              |
| <b>TLR3 rs3775291</b>                               | 552                | 9                                             | 35                          | increased risk for melanoma-related mortality (P=0.04)                                         | [5]              |

## References

1. Bouwhuis MG, Gast A, Figl A, Eggermont AM, Hemminki K, Schadendorf D, Kumar R. Polymorphisms in the CD28/CTLA4/ICOS genes: role in malignant melanoma susceptibility and prognosis? *Cancer immunology, immunotherapy* : CII 2010;**59**(2):303-12 doi: 10.1007/s00262-009-0751-2[published Online First: Epub Date]].

2. Lee JE, Lu M, Mansfield PF, Platsoucas CD, Reveille JD, Ross MI. Malignant melanoma: relationship of the human leukocyte antigen class II gene DQB1\*0301 to disease recurrence in American Joint Committee on Cancer Stage I or II. *Cancer* 1996;**78**(4):758-63 doi: 10.1002/(SICI)1097-0142(19960815)78:4<758::AID-CNCR11>3.0.CO;2-U[published Online First: Epub Date]].
3. Liu D, O'Day SJ, Yang D, Boasberg P, Milford R, Kristedja T, Groshen S, Weber J. Impact of gene polymorphisms on clinical outcome for stage IV melanoma patients treated with biochemotherapy: an exploratory study. *Clin Cancer Res* 2005;**11**(3):1237-46
4. Lenci RE, Bevier M, Brandt A, Bermejo JL, Sucker A, Moll I, Planelles D, Requena C, Nagore E, Hemminki K, Schadendorf D, Kumar R. Influence of genetic variants in type I interferon genes on melanoma survival and therapy. *PloS one* 2012;**7**(11):e50692 doi: 10.1371/journal.pone.0050692[published Online First: Epub Date]].
5. Park JY, Amankwah EK, Anic GM, Lin HY, Walls B, Park H, Krebs K, Madden M, Maddox K, Marzban S, Fang S, Chen W, Lee JE, Wei Q, Amos CI, Messina JL, Sondak VK, Sellers TA, Egan KM. Gene variants in angiogenesis and lymphangiogenesis and cutaneous melanoma progression. *Cancer Epidemiol Biomarkers Prev* 2013;**22**(5):827-34 doi: 10.1158/1055-9965.EPI-12-1129[published Online First: Epub Date]].
6. Martinez-Escribano JA, Moya-Quiles MR, Muro M, Montes-Ares O, Hernandez-Caselles T, Frias JF, Alvarez-Lopez MR. Interleukin-10, interleukin-6 and interferon-gamma gene polymorphisms in melanoma patients. *Melanoma Res* 2002;**12**(5):465-9
7. Alonso R, Suarez A, Castro P, Lacave AJ, Gutierrez C. Influence of interleukin-10 genetic polymorphism on survival rates in melanoma patients with advanced disease. *Melanoma Res* 2005;**15**(1):53-60

**Supplementary Table 2:** List of 72 tag SNPs in 44 candidate immunomodulatory genes

| SNP        | Gene  | Position (hg19) |
|------------|-------|-----------------|
| rs12024371 | BCL10 | chr1:85738184   |
| rs12744565 | BCL10 | chr1:85739777   |
| rs7540530  | RORC  | chr1:151790857  |
| rs3024493  | IL10  | chr1:206943967  |
| rs3024490  | IL10  | chr1:206945310  |
| rs2222202  | IL10  | chr1:206945380  |
| rs12407485 | IL19  | chr1:206981718  |
| rs12145973 | IL19  | chr1:206994724  |
| rs2243193  | IL19  | chr1:207016224  |
| rs1400986  | IL20  | chr1:207038685  |
| rs2981573  | IL20  | chr1:207040576  |
| rs1518108  | IL20  | chr1:207043173  |
| rs1417488  | TGFB2 | chr1:218523729  |
| rs2009112  | TGFB2 | chr1:218553528  |
| rs10779329 | TGFB2 | chr1:218573740  |
| rs2856836  | IL1A  | chr2:113532082  |
| rs1609682  | IL1A  | chr2:113540204  |
| rs1143634  | IL1B  | chr2:113590389  |
| rs1143633  | IL1B  | chr2:113590466  |
| rs2723168  | IL37  | chr2:113670889  |
| rs3811047  | IL37  | chr2:113671409  |
| rs12711747 | IL36B | chr2:113785019  |
| rs1562302  | IL36B | chr2:113810457  |
| rs231777   | CTLA4 | chr2:204733587  |
| rs231779   | CTLA4 | chr2:204734486  |
| rs2227543  | IL8   | chr4:74607909   |
| rs2069772  | IL2   | chr4:123373132  |
| rs2221903  | IL21  | chr4:123538911  |
| rs13143866 | IL21  | chr4:123540757  |
| rs4956405  | IL15  | chr4:142627648  |
| rs10519610 | IL15  | chr4:142637100  |
| rs40401    | IL3   | chr5:131396477  |
| rs2069812  | IL5   | chr5:131879915  |
| rs848      | IL13  | chr5:131996499  |
| rs2243266  | IL4   | chr5:132013788  |
| rs1859430  | IL9   | chr5:135230512  |
| rs2227447  | IL17B | chr5:148758026  |
| rs2069840  | IL6   | chr7:22768571   |
| rs6993386  | IL7   | chr8:79654144   |

---

|                   |        |                 |
|-------------------|--------|-----------------|
| <b>rs12551256</b> | IL33   | chr9:6231238    |
| <b>rs3781092</b>  | GATA3  | chr10:8106352   |
| <b>rs3882891</b>  | IL18   | chr11:112014760 |
| <b>rs11570948</b> | IL26   | chr12:68603962  |
| <b>rs2046068</b>  | IL22   | chr12:68645974  |
| <b>rs17224704</b> | IL22   | chr12:68646835  |
| <b>rs7977932</b>  | IL31   | chr12:122657382 |
| <b>rs6490605</b>  | IL17D  | chr13:21285008  |
| <b>rs6783</b>     | IL17D  | chr13:21297049  |
| <b>rs7145531</b>  | IL25   | chr14:23842016  |
| <b>rs3811178</b>  | IL25   | chr14:23845243  |
| <b>rs1009978</b>  | LGALS3 | chr14:55603060  |
| <b>rs11639206</b> | IL16   | chr15:81498927  |
| <b>rs4573895</b>  | IL16   | chr15:81499153  |
| <b>rs12441273</b> | IL16   | chr15:81519580  |
| <b>rs4778888</b>  | IL16   | chr15:81524612  |
| <b>rs4072680</b>  | IL16   | chr15:81584388  |
| <b>rs1554999</b>  | IL32   | chr16:3115627   |
| <b>rs11865804</b> | IL34   | chr16:70681490  |
| <b>rs305083</b>   | IRF8   | chr16:85935877  |
| <b>rs2292980</b>  | IRF8   | chr16:85945075  |
| <b>rs12926854</b> | IRF8   | chr16:85951257  |
| <b>rs16940005</b> | IRF8   | chr16:85953681  |
| <b>rs2107538</b>  | CCL5   | chr17:34207779  |
| <b>rs2293154</b>  | STAT5A | chr17:40461002  |
| <b>rs2293152</b>  | STAT3  | chr17:40481528  |
| <b>rs2306580</b>  | STAT3  | chr17:40491679  |
| <b>rs11657479</b> | TBX21  | chr17:45822900  |
| <b>rs3093030</b>  | ICAM1  | chr19:10397402  |
| <b>rs11888</b>    | JAK3   | chr19:17935625  |
| <b>rs3212760</b>  | JAK3   | chr19:17947545  |
| <b>rs1042506</b>  | IL11   | chr19:55877110  |
| <b>rs10964859</b> | IFNW1  | chr9:21140672   |

---

**Supplementary Table 3:** List of 24 tag SNPs selected for fine mapping of the 1q32.1 locus.

| <b>SNP</b>        | <b>Position (hg19)</b> |
|-------------------|------------------------|
| <b>rs6658896</b>  | chr1:206926845         |
| <b>rs6692511</b>  | chr1:206927515         |
| <b>rs4390174</b>  | chr1:206932450         |
| <b>rs13376708</b> | chr1:206932502         |
| <b>rs3021094</b>  | chr1:206944951         |
| <b>rs3024491</b>  | chr1:206945045         |
| <b>rs1800871</b>  | chr1:206946633         |
| <b>rs1800894</b>  | chr1:206946665         |
| <b>rs1800896</b>  | chr1:206946896         |
| <b>rs1800890</b>  | chr1:206949364         |
| <b>rs4072227</b>  | chr1:206957557         |
| <b>rs6683473</b>  | chr1:206967151         |
| <b>rs10746433</b> | chr1:206974966         |
| <b>rs12046559</b> | chr1:206989066         |
| <b>rs1028182</b>  | chr1:207001878         |
| <b>rs2243188</b>  | chr1:207014471         |
| <b>rs960326</b>   | chr1:207014775         |
| <b>rs7528265</b>  | chr1:207019162         |
| <b>rs1033272</b>  | chr1:207030984         |
| <b>rs41434745</b> | chr1:207031791         |
| <b>rs1109461</b>  | chr1:207041802         |
| <b>rs3024521</b>  | chr1:207042276         |
| <b>rs3093445</b>  | chr1:207073909         |
| <b>rs12121499</b> | chr1:207080564         |

**Supplementary Table 4:** Association between clinical covariates and OS

| Variable                           | No. (%)    | Univariate        |                             | Multivariate     |                             |
|------------------------------------|------------|-------------------|-----------------------------|------------------|-----------------------------|
|                                    |            | HR (CI 95%)       | <i>P</i> value <sup>1</sup> | HR (CI 95%)      | <i>P</i> value <sup>1</sup> |
| <b>Stage at primary diagnosis</b>  |            |                   |                             |                  |                             |
| I                                  | 803 (67.7) | Ref               |                             | Ref              |                             |
| II                                 | 196 (16.5) | 3.46 (2.31-5.21)  |                             | 1.32 (0.65-2.67) |                             |
| III                                | 187 (15.8) | 5.10 (3.51-7.42)  | <2.2x10 <sup>-16</sup>      | 2.90 (1.48-5.69) | 0.00012                     |
| <b>Primary tumor thickness</b>     |            |                   |                             |                  |                             |
| <1.0                               | 609 (52.7) | Ref               |                             | Ref              |                             |
| 1.0-2.0                            | 265 (22.9) | 1.53 (0.93-2.51)  |                             | 1.20 (0.64-2.25) |                             |
| 2.01-4.0                           | 168 (14.5) | 3.18 (2.00-5.04)  |                             | 1.12 (0.51-2.47) |                             |
| >4.0                               | 113 (9.8)  | 6.56 (4.20-10.26) | <2.2x10 <sup>-16</sup>      | 2.21 (0.97-5.01) | 0.025                       |
| <b>Ulceration</b>                  |            |                   |                             |                  |                             |
| No                                 | 940 (81.8) | Ref               |                             | Ref              |                             |
| Yes                                | 209 (18.2) | 3.64 (2.64-5.02)  | 3.59x10 <sup>-14</sup>      | 1.61 (1.06-2.44) | 0.023                       |
| <b>Mitotic rate</b>                |            |                   |                             |                  |                             |
| <1/mm <sup>2</sup>                 | 647 (59.5) | Ref               |                             | Ref              |                             |
| ≥1/mm <sup>2</sup>                 | 441 (40.5) | 2.49 (1.76-3.52)  | 1.24x10 <sup>-7</sup>       | 1.14 (0.72-1.79) | 0.57                        |
| <b>Primary tumor anatomic site</b> |            |                   |                             |                  |                             |
| Axial                              | 655 (56.5) | Ref               |                             | -                |                             |
| Extremity                          | 504 (43.5) | 0.81 (0.58-1.13)  | 0.20                        | -                | -                           |
| <b>Histological subtype</b>        |            |                   |                             |                  |                             |
| Superficial Spreading              | 642 (59.2) | Ref               |                             | Ref              |                             |
| Nodular                            | 278 (25.6) | 3.51 (2.41-5.13)  |                             | 1.63 (1.01-2.64) |                             |
| Other                              | 165 (15.2) | 2.85 (1.78-4.58)  | 2.36x10 <sup>-11</sup>      | 2.24 (1.32-3.80) | 0.011                       |
| <b>Sentinel Lymph Node Biopsy</b>  |            |                   |                             |                  |                             |
| No                                 |            | Ref               |                             | -                |                             |
| Yes                                |            | 1.25 (0.91-1.72)  | 0.17                        | -                | -                           |
| <b>Age at primary diagnosis</b>    |            |                   |                             |                  |                             |
| ≤60                                | 630 (53.1) | Ref               |                             | Ref              |                             |
| >60                                | 556 (46.9) | 2.29 (1.67-3.16)  | 2.31x10 <sup>-7</sup>       | 1.96 (1.36-2.83) | 0.00024                     |
| <b>Gender</b>                      |            |                   |                             |                  |                             |
| Female                             | 436 (42.6) | Ref               |                             | Ref              |                             |
| Male                               | 588 (57.4) | 1.34 (0.97-1.86)  | 0.074                       | 1.21 (0.84-1.74) | 0.31                        |
| <b>Family History of Melanoma</b>  |            |                   |                             |                  |                             |
| No                                 | 948 (83.6) | Ref               |                             | Ref              |                             |
| Yes                                | 186 (16.4) | 0.56 (0.34-0.92)  | 0.014                       | 0.69 (0.39-1.23) | 0.19                        |

<sup>1</sup>*P* value based on likelihood ratio test.



**Supplementary Table 5: IL10 haplotype analysis.**

| <b>IL10 Haplotype</b> | <b>Count (Freq.)</b> | <b>HR (95% CI)</b> | <b>P value</b> |
|-----------------------|----------------------|--------------------|----------------|
| <b>GGCAT/GGCAT</b>    | 270 (0.29)           | Ref                | Ref            |
| <b>GTTGA/GGCAT</b>    | 206 (0.22)           | 0.47 (0.26-0.86)   | 0.013          |
| <b>TTTGA/GGCAT</b>    | 158 (0.17)           | 0.42 (0.22-0.79)   | 0.0074         |
| <b>GTTGT/GGCAT</b>    | 88 (0.09)            | 0.87 (0.46-1.62)   | 0.66           |
| <b>GTTGA/TTTGA</b>    | 63 (0.07)            | 0.23 (0.08-0.66)   | 0.0061         |
| <b>TTTGA/GTTGT</b>    | 40 (0.04)            | 0.41 (0.15-1.08)   | 0.07           |
| <b>GTTGA/GTTGA</b>    | 39 (0.04)            | 0.4 (0.12-1.36)    | 0.14           |
| <b>GTTGT/GTTGA</b>    | 37 (0.04)            | 1.03 (0.31-3.41)   | 0.96           |
| <b>TTTGA/TTTGA</b>    | 17 (0.02)            | 4.68 (1.60-13.7)   | 0.0048         |
| <b>GTTGT/GTTGT</b>    | 11 (0.01)            | 0.46 (0.06-3.46)   | 0.45           |
|                       |                      |                    | 0.00069*       |

\*P value based on omnibus haplotype block association test.

**Supplementary Figure 1:** Kaplan-Meier plot for rs3024493 genotypes associated with overall survival ( $P$  value = 0.027).  $P$  value was calculated using log-rank test.

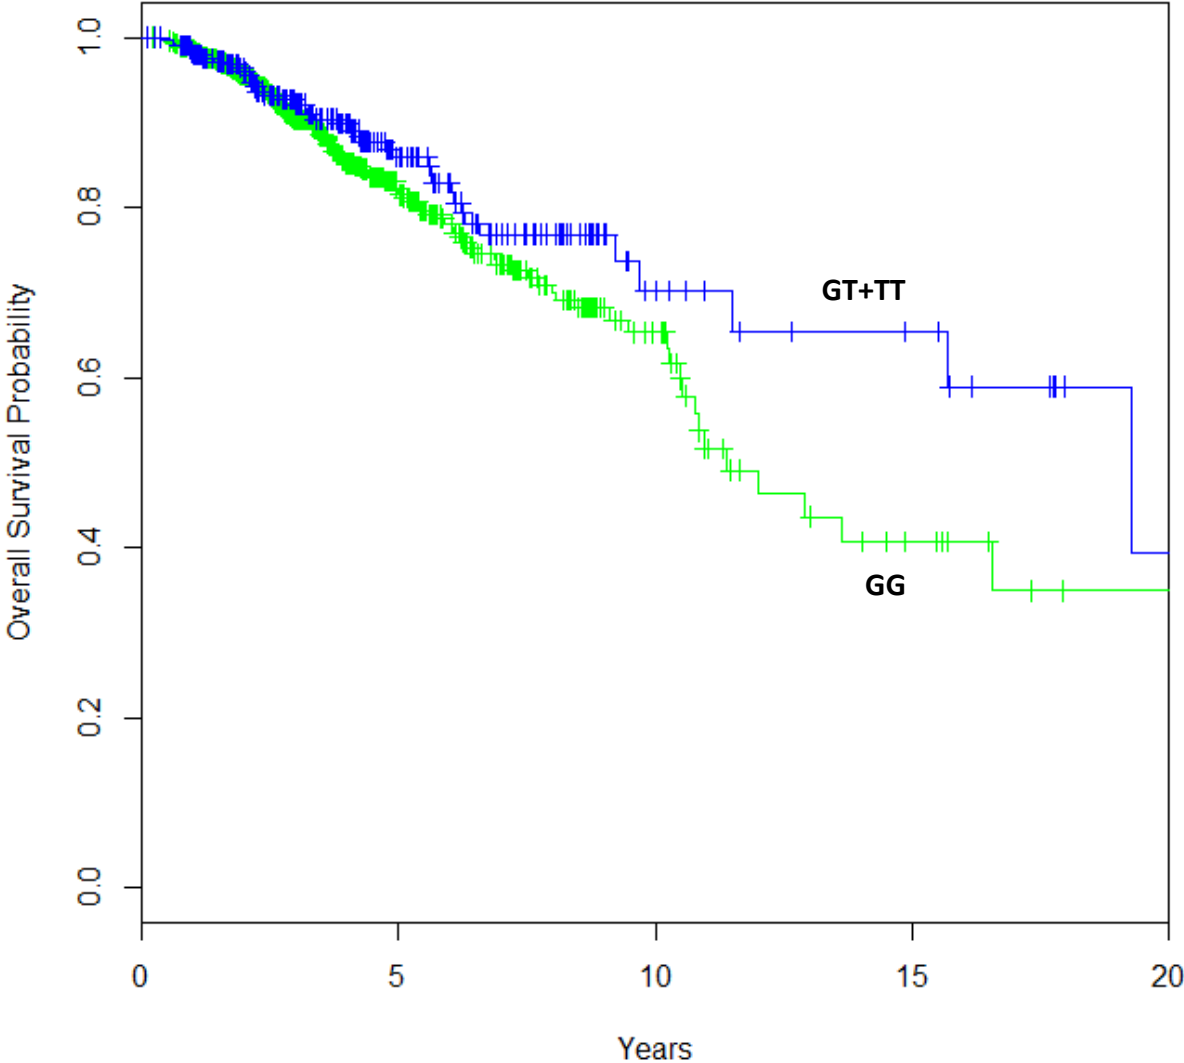

**Supplementary Figure 2:** Kaplan-Meier plot for rs1800890 genotypes associated with overall survival ( $P$  value = 0.0048)  $P$  value was calculated using log-rank test.

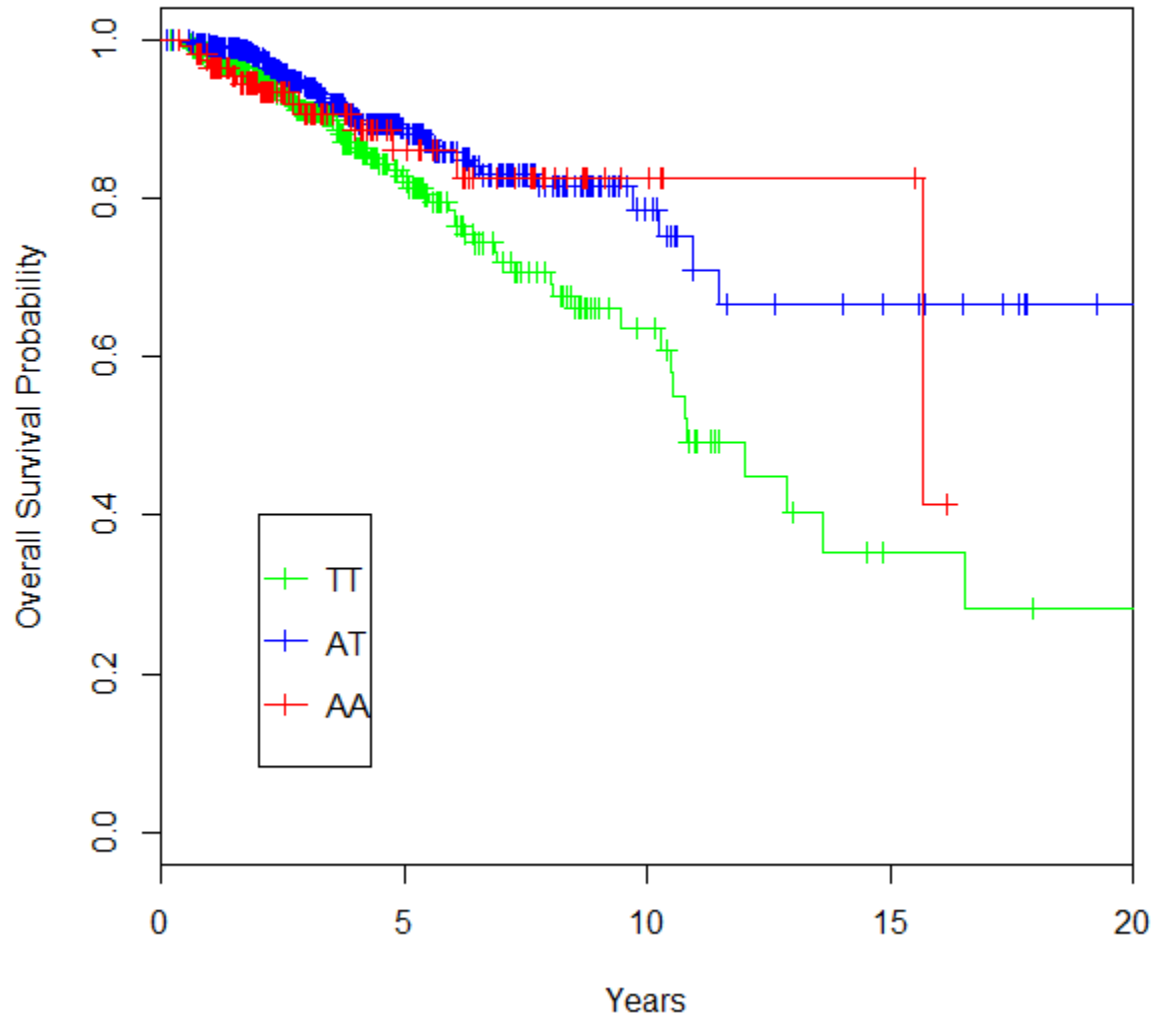

**Supplementary Figure 3:** Correlation between rs3024493 genotypes and secretion of seven selected cytokines

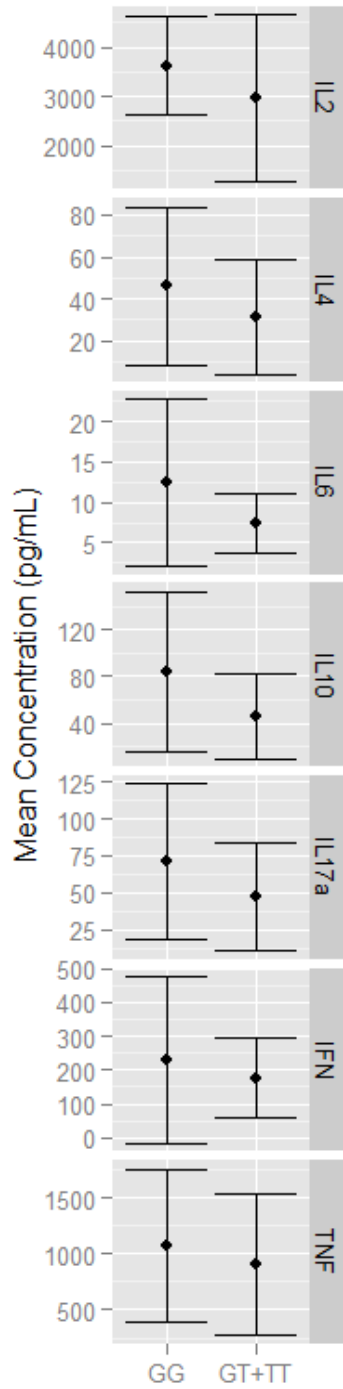

**Supplementary Figure 4:** Correlation between other 1p32 variants and IL10 secretion.

Genotypes are marked with 0 – reference homozygotes; 1- heterozygotes and 2 – minor allele

homozygotes. Spearman correlation test was used for assessing the statistical significance (*P* values).

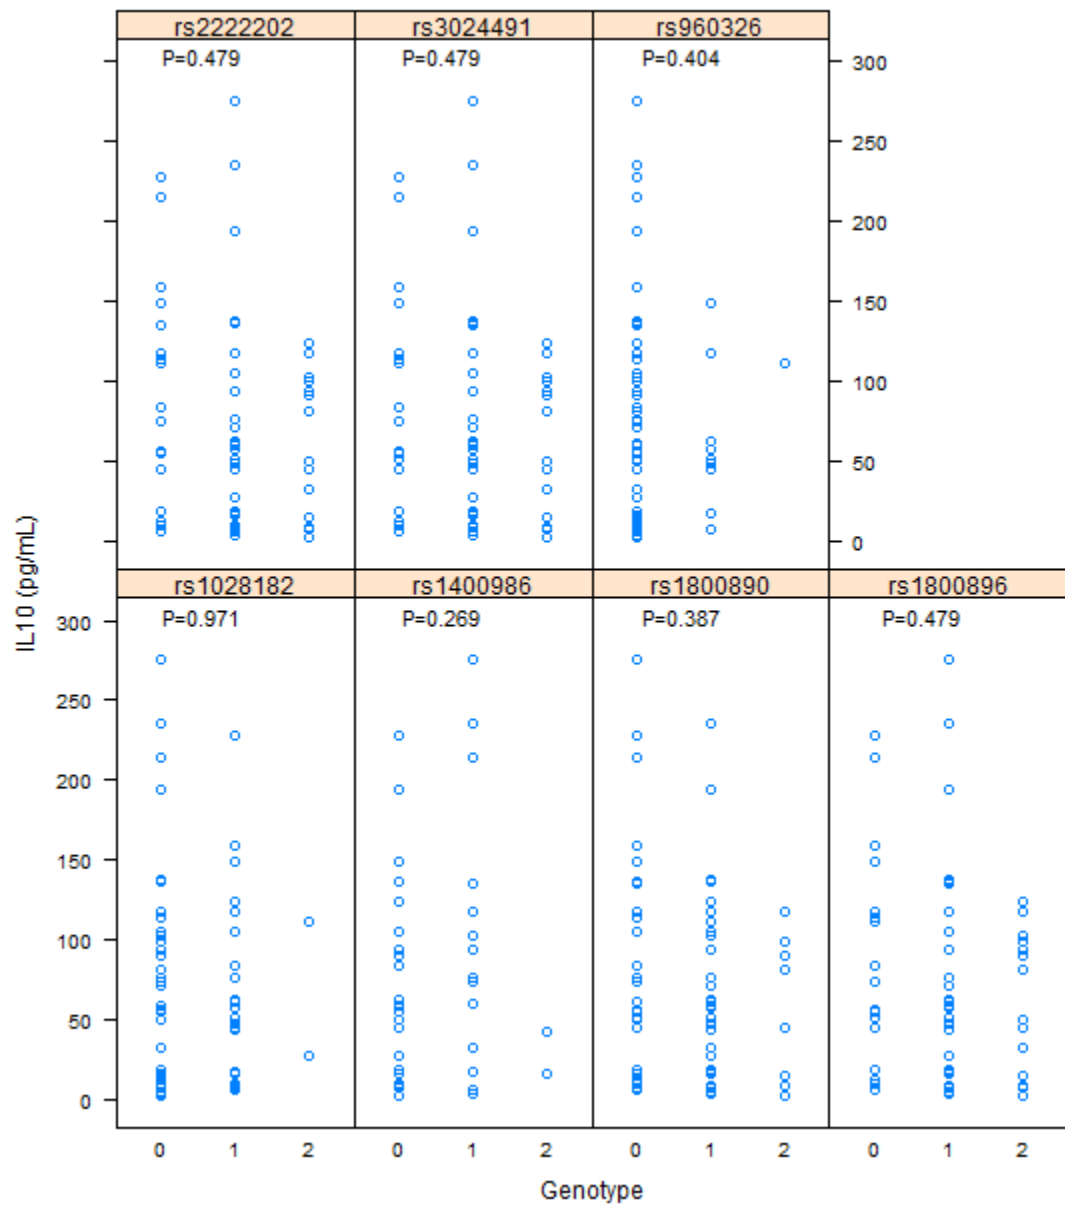

**Supplementary Figure 5: Overall survival versus recurrence-free survival by SNPs from Table2.** Estimated hazard ratios (HR) of heterozygotes ( $\blacktriangle$ ) and minor allele homozygotes ( $\bullet$ ) for variants significantly associated in OS are plotted. Most significantly associated variant in the study is marked (*red*). Pearson's correlation was used to assess relationship between OS and RFS ( $r=0.89$ ,  $P<0.0001$ ).

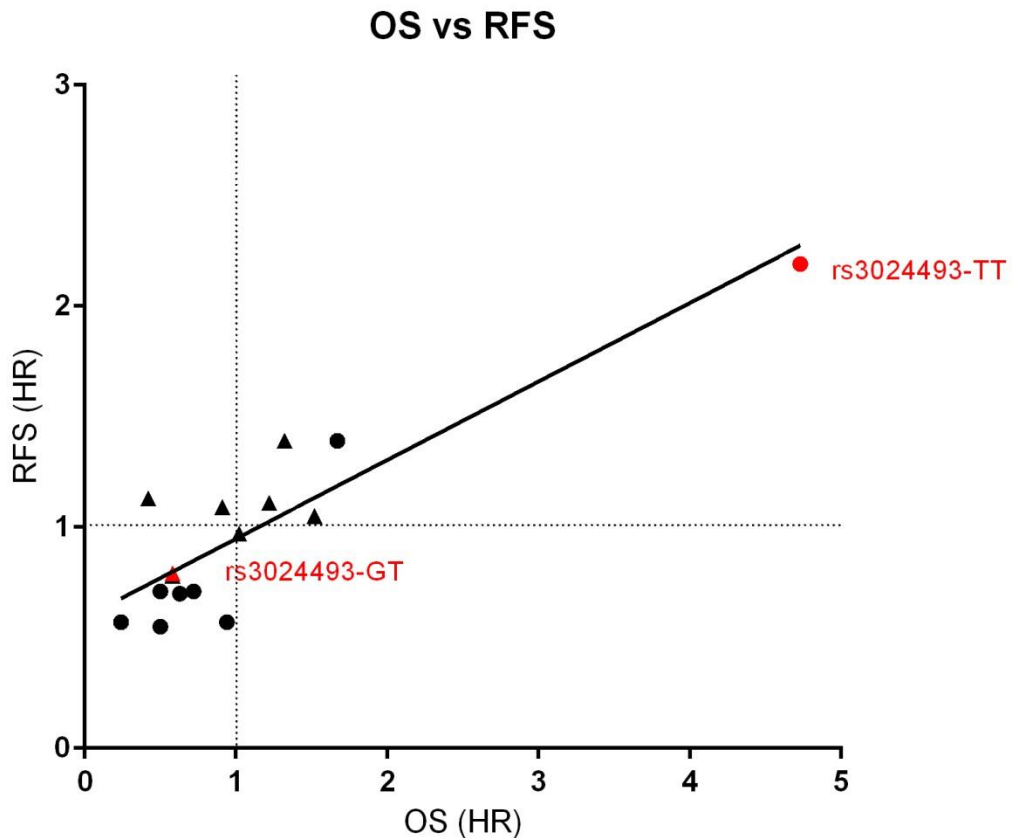

Note that  $HR > 1$  indicates potential risk effect and  $HR < 1$  indicates protective effect. While overall concordance between the HRs of OS and RFS is clearly very high, the concordance is actually perfect among the minor allele homozygotes ( $\bullet$ ) as also summarized below:

|          | OS HR<1 | OS HR>1 |
|----------|---------|---------|
| RFS HR<1 | 6       | 0       |
| RFS HR>1 | 0       | 2       |
